# Supplementary material for: A qPCR-Based Survey of Haplosporidium nelsoni and Perkinsus spp. in the Eastern Oyster, Crassostrea virginica in Maine, USA
Source: PubMed Central journal article supplement (PMC7238206; doi:10.3390/pathogens9040256), 2020-03-31
Supplement: pathogens-09-00256-s001.pdf [file pathogens-09-00256-s001.pdf]

**Supplementary Table 1.** Biometrics of the sampled oysters (n=24 for each sampling site) during the study.

| Location          | Month | 2016       |       |             |       | 2017       |       |             |       |
|-------------------|-------|------------|-------|-------------|-------|------------|-------|-------------|-------|
|                   |       | Weight (g) | ±SD   | Length (mm) | ±SD   | Weight (g) | ±SD   | Length (mm) | ±SD   |
| Bagaduce River    | Jun   | 39.33      | 6.38  | 60.21       | 3.24  | 39.54      | 6.09  | 61.73       | 4.08  |
|                   | Jul   | 37.08      | 5.00  | 71.88       | 2.47  | 45.21      | 5.42  | 77.46       | 4.22  |
|                   | Aug   | 42.71      | 6.92  | 76.79       | 4.54  | 54.88      | 8.65  | 80.92       | 4.94  |
|                   | Sept  | 56.00      | 8.24  | 84.46       | 6.81  | 63.25      | 6.40  | 89.50       | 5.82  |
|                   | Oct   | 50.88      | 6.29  | 79.08       | 3.39  | 65.12      | 6.87  | 82.67       | 4.90  |
| Weskeag River     | Jun   | 75.04      | 21.38 | 85.13       | 6.54  | 66.96      | 14.21 | 87.10       | 11.98 |
|                   | Jul   | 43.67      | 7.29  | 60.00       | 6.60  | 92.00      | 23.11 | 92.96       | 10.08 |
|                   | Aug   | 66.29      | 22.02 | 84.42       | 13.49 | 93.64      | 49.77 | 87.62       | 17.95 |
|                   | Sept  | 54.75      | 10.6  | 76.92       | 5.60  | 133.38     | 54.79 | 103.12      | 15.36 |
|                   | Oct   | 94.17      | 33.84 | 92.50       | 17.50 | 123.04     | 47.61 | 105.71      | 16.36 |
| Jack's Point      | Jun   | 34.96      | 6.22  | 74.5        | 6.82  | 38.5       | 9.41  | 57.42       | 5.06  |
|                   | Jul   | 26.08      | 4.35  | 65.5        | 5.07  | 43.29      | 8.18  | 76.42       | 4.99  |
|                   | Aug   | 47.75      | 5.33  | 77.62       | 5.05  | 50.54      | 11.08 | 80.29       | 7.18  |
|                   | Sept  | 27.62      | 4.92  | 73.38       | 6.21  | 41.96      | 9.76  | 83.08       | 10.59 |
|                   | Oct   | 64.08      | 9.04  | 85.5        | 7.34  | 40.67      | 8.67  | 81.21       | 6.21  |
| Prentiss Island   | Jun   | 66.75      | 21.45 | 87.74       | 10.77 | 53.29      | 9.89  | 75.16       | 6.68  |
|                   | Jul   | 69.67      | 15.24 | 89.75       | 10.49 | 66.92      | 19.94 | 88.33       | 8.88  |
|                   | Aug   | 67.79      | 11.92 | 92.21       | 9.05  | 68.04      | 14.99 | 90.00       | 10.58 |
|                   | Sept  | 83.92      | 16.2  | 94.58       | 13.29 | 63.00      | 13.56 | 98.29       | 7.74  |
|                   | Oct   | 74.54      | 12.23 | 90.04       | 8.66  | 42.29      | 7.12  | 85.12       | 8.37  |
| New Meadows River | Jun   | 86.46      | 15.16 | 83.75       | 9.24  | 40.79      | 16.18 | 64.37       | 5.68  |
|                   | Jul   | 86.46      | 12.05 | 103.00      | 9.86  | 50.33      | 10.61 | 84.88       | 8.01  |
|                   | Aug   | 97.62      | 15.72 | 103.96      | 11.72 | 55.25      | 11.82 | 87.83       | 10.09 |
|                   | Sept  | 44.33      | 10.26 | 78.50       | 6.28  | 48.62      | 8.67  | 84.33       | 6.67  |
|                   | Oct   | 38.33      | 6.99  | 82.04       | 8.62  | 45.71      | 10.40 | 86.62       | 8.43  |
| Webhannet River   | Jun   | 47.96      | 9.63  | 86.50       | 8.18  | 67.54      | 18.80 | 74.55       | 12.11 |
|                   | Jul   | 52.42      | 13.07 | 68.08       | 8.39  | 58.00      | 13.02 | 79.04       | 10.1  |
|                   | Aug   | 47.42      | 8.45  | 76.79       | 6.55  | 58.00      | 13.02 | 79.04       | 10.1  |
|                   | Sept  | 46.46      | 10.37 | 79.92       | 6.73  | 103.54     | 32.72 | 99.08       | 15.57 |
|                   | Oct   | 83.42      | 19.03 | 99.08       | 14.23 | 58.58      | 12.20 | 76.25       | 8.57  |
